# Supplementary material for: Giant thermal conductivity in diamane and the influence of horizontal reflection symmetry on phonon scattering
Source: Royal Society of Chemistry journal article supplement (doi:10.1039/c8nr08493a), 2018-12-14
Supplement: c8nr08493a1.pdf [file c8nr08493a1.pdf]

## Supplementary information

# Giant Thermal Conductivity in Diamane and the Influence of Horizontal Reflection Symmetry on Phonon Scattering

Liyan Zhu<sup>1,2</sup>, Wu Li<sup>3</sup>, and Feng Ding<sup>2,4\*</sup>

## I. Convergence tests

### 1. Energy cutoff

We first test the plane wave cutoff energy ( $E_{\text{cut}}$ ) on the convergence of total energies and frequencies of highest optical phonon at the  $\Gamma$  point. The D-AB is selected as an example. When the  $E_{\text{cut}}$  is larger than 140 Ry, the variance of total energy is smaller than  $1.0 \times 10^{-4}$  Ry. As for the frequencies of optical phonons, the  $E_{\text{cut}}$  being larger than 150 Ry could make their variance within  $0.1 \text{ cm}^{-1}$ . Hence, the  $E_{\text{cut}}$  is set to be 150 Ry in the following calculations.

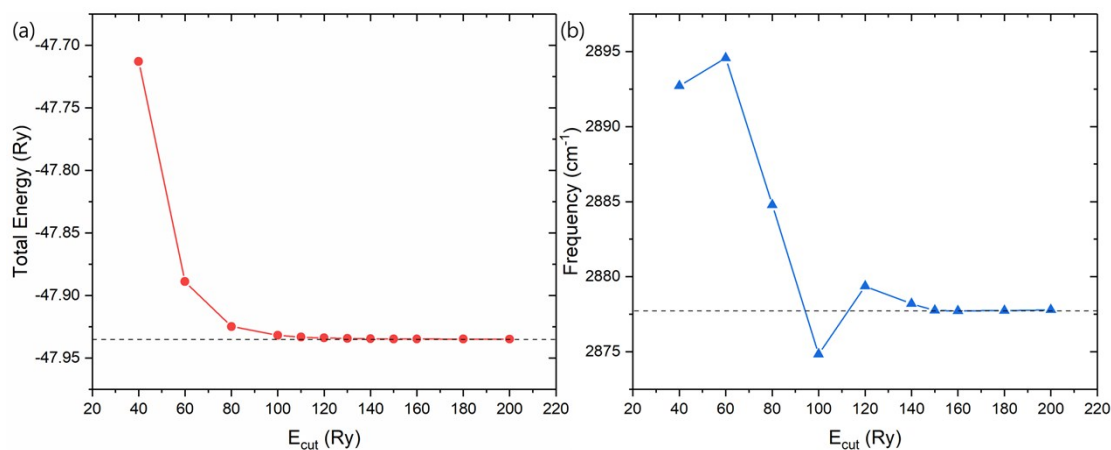

Figure S1. Effect of energy cutoff on (a) total energies and (b) frequencies of highest optical phonon at the  $\Gamma$  point.

### 2. K-point meshes for the electrons

We next the convergence of total energies and frequencies on the K-point meshes. When the K-point mesh being finer than  $19 \times 19 \times 1$  is adequate to make the variance of total energies and frequencies with  $10^{-7}$  Ry and  $0.05 \text{ cm}^{-1}$ .

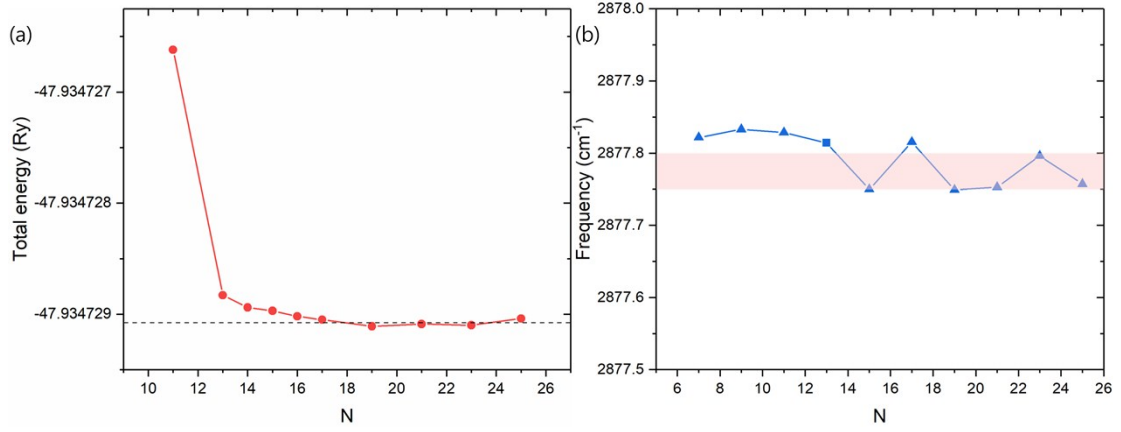

Figure S2. (a) Total energy and (b) frequency of highest optical phonon at the  $\Gamma$  point as a function of k-point meshes ( $N \times N \times 1$ ) employed in electronic self-consistent field calculations.

### 3. K-point meshes for phonons

To test the convergence with respect to the K-point meshes when solving Boltzmann transport equation, we directly calculate the thermal conductivities as a function of the K-point meshes as shown in Fig. S3. When the K-point meshes are  $60 \times 60 \times 1$ ,  $70 \times 70 \times 1$ , and  $80 \times 80 \times 1$ , the thermal conductivities are 1946.6, 1956.2, and 1958.8 W/m-K, respectively. So, the K-point mesh of  $80 \times 80 \times 1$  is a safe choice to get convergent thermal conductivity.

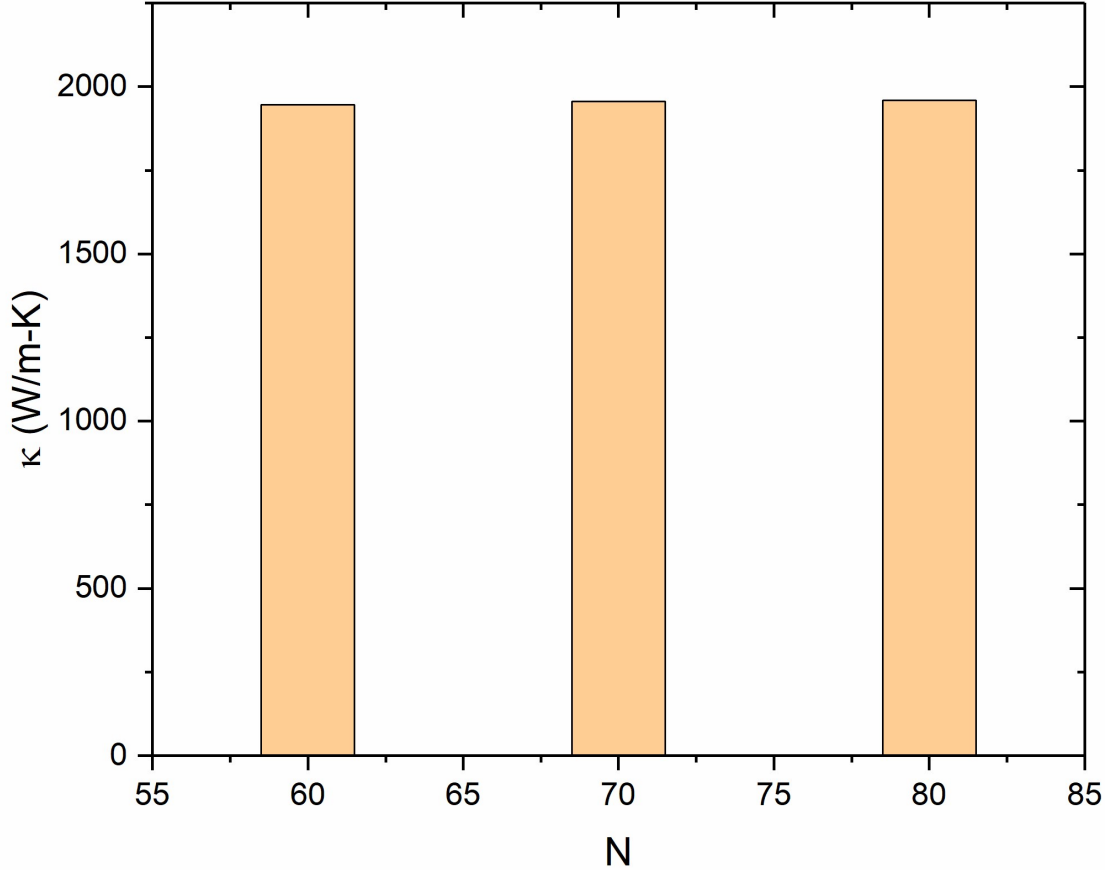

Figure S3. The thermal conductivities as a function of k-point meshes ( $N \times N \times 1$ ) for solving Boltzmann transport equations.

#### 4. Convergence tests on second order force constants

To make sure the size of q-mesh is large enough during calculation of second force constants, we directly compare the phonon dispersion of D-AB with q-meshes changing from  $7\times 7\times 1$ ,  $8\times 8\times 1$ , to  $9\times 9\times 1$ . As shown in Fig. S4, the phonon dispersions are almost the same for all three cases. Hence, a q-mesh of  $7\times 7\times 1$  is large enough to guarantee the accuracy of second order force constants.

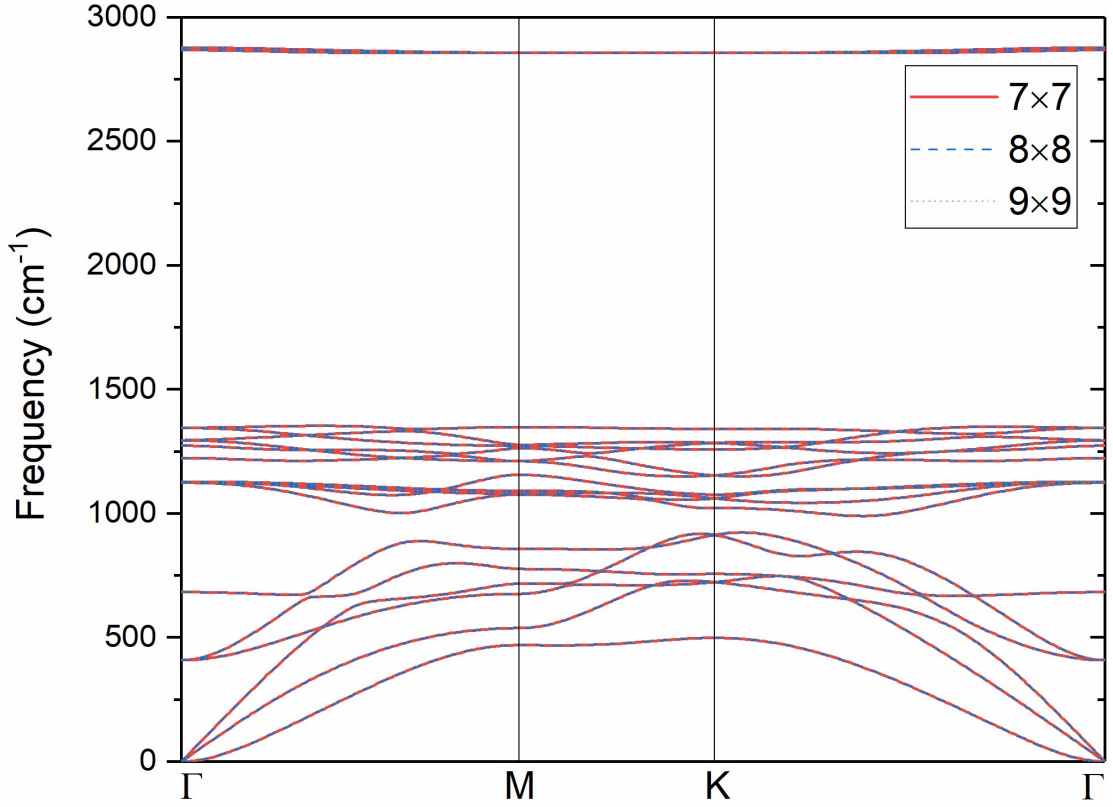

Figure S4. The effect of size of supercell on the phonon dispersion.

#### 5. Convergence tests on third order force constants

To test the convergence on the size of q-mesh employed in calculating third order force constants, we compared the thermal conductivity of D-AB by using a  $4\times 4\times 1$  and a  $8\times 8\times 1$  q-mesh for the third order force constants, which are 1956.2 and 1969.8 W/m-K, of which the relative error is smaller than 0.7%. We also test the effect of q-meshes on the phonon line width for the 10<sup>th</sup> and 18<sup>th</sup> optical phonon at the  $\Gamma$  point as shown in Fig. S6. Apparently, the phonon line widths are almost the same for q-meshes of  $4\times 4\times 1$  and  $8\times 8\times 1$ .

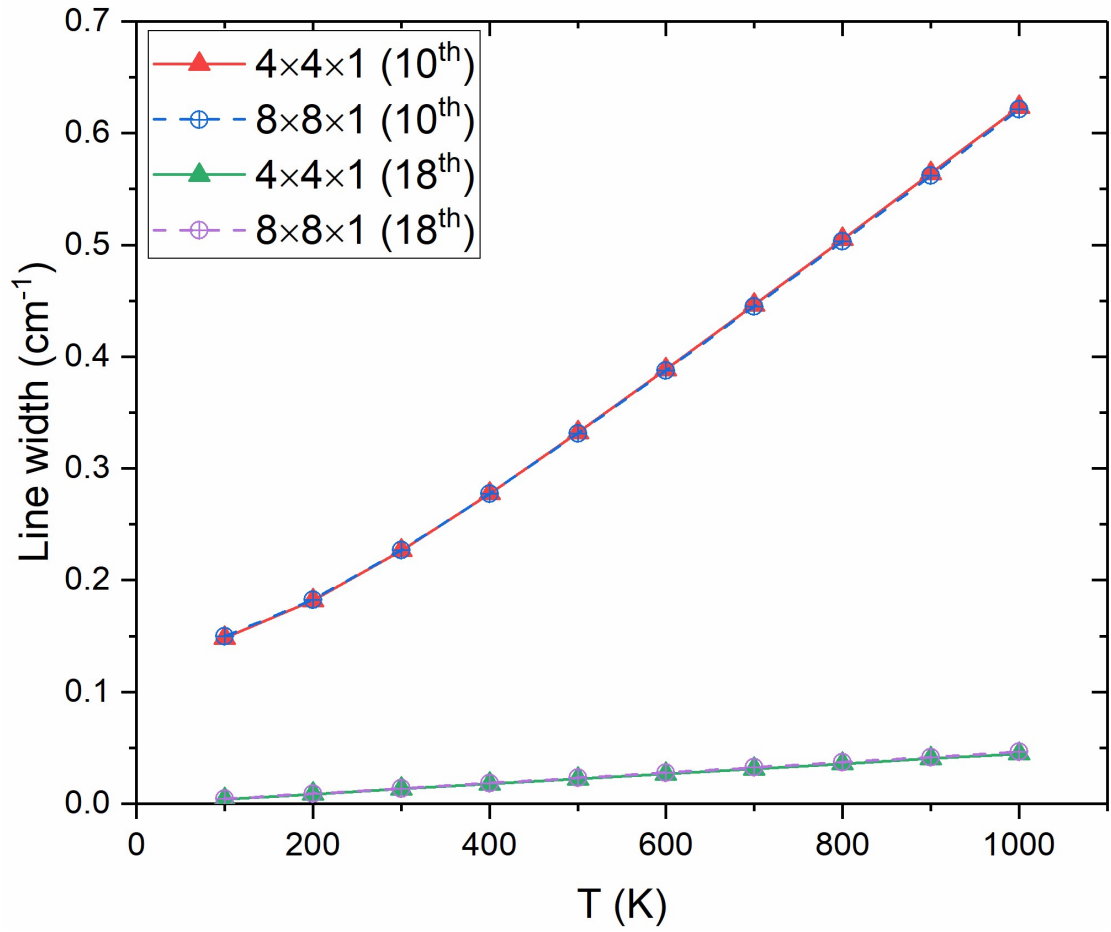

Fig. S5. Line width for the 10<sup>th</sup> and 18<sup>th</sup> branches of phonons at the  $\Gamma$  point versus the size of q-mesh employed to calculate third order force constants.

## II. Distribution of scattering rates of a near-zone-center ZA phonon

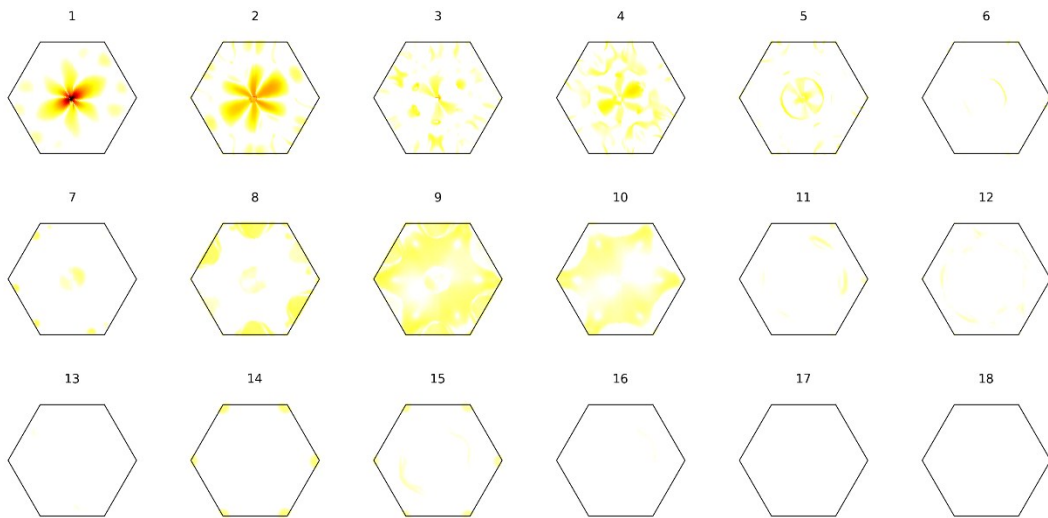

Figure S6. Distribution of scattering rates of a near-zone-center ZA phonon,  $(\mathbf{q}_1, \nu_1) + (\mathbf{q}_2, \nu_2) \rightarrow (\mathbf{q}_3, \nu_3)$ , in Brillouin zone for D-AB, where  $\mathbf{q}_1 = (0.01, 0, 0)$  (in units of reciprocal lattice

vectors) and  $v_1 = \text{ZA}$ . The  $v_2$  run over all 18 branches. In each panel, the scattering rates are summed over  $v_3$ . The color bar is the same as that in Fig. 9.

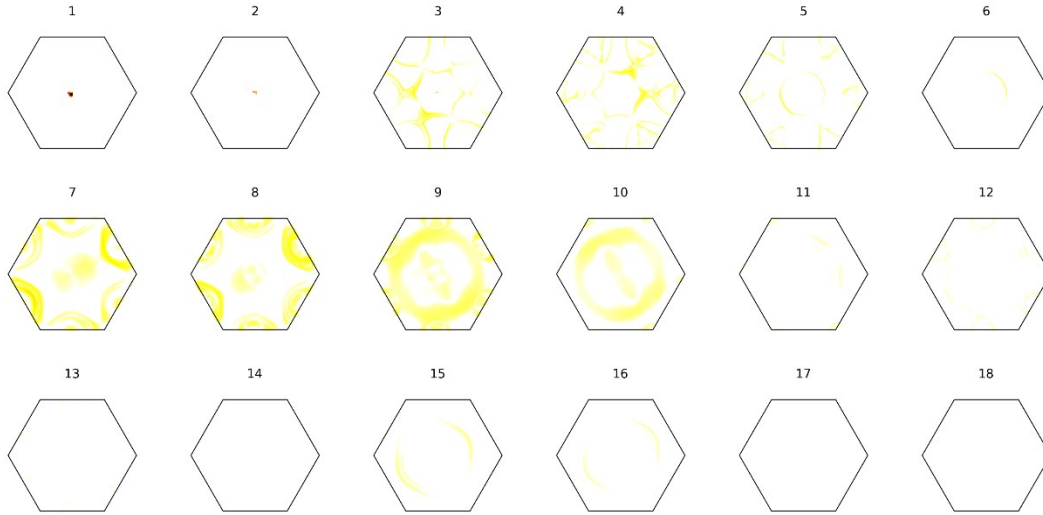

Figure S7. Distribution of scattering rates of a near-zone-center ZA phonon,  $(\mathbf{q}_1, v_1) + (\mathbf{q}_2, v_2) \rightarrow (\mathbf{q}_3, v_3)$ , in Brillouin zone for D-AA, where  $\mathbf{q}_1 = (0.01, 0, 0)$  (in units of reciprocal lattice vectors) and  $v_1 = \text{ZA}$ . The  $v_2$  run over all 18 branches. In each panel, the scattering rates are summed over  $v_3$ . The color bar is the same as that in Fig. 9.

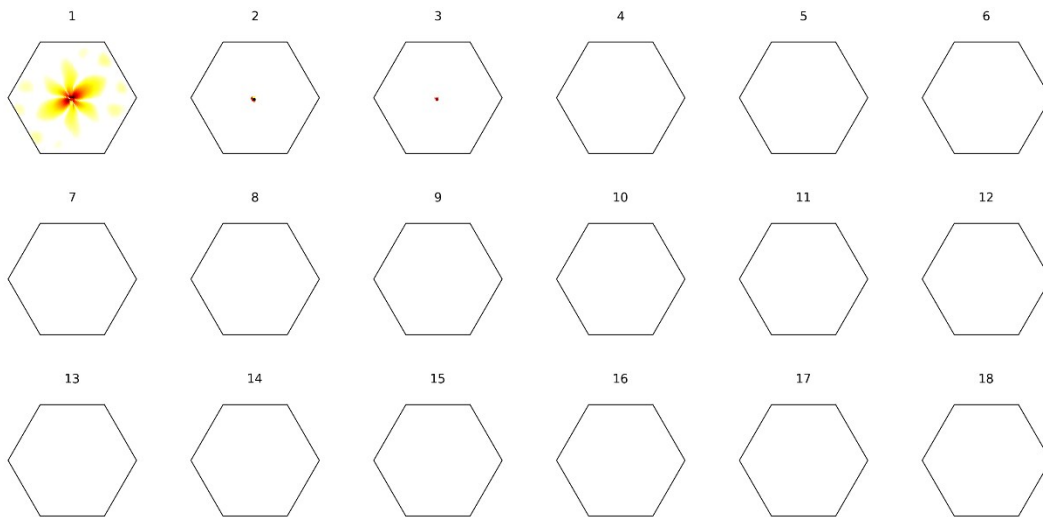

Figure S8. Distribution of scattering rates of a near-zone-center ZA phonon,  $(\mathbf{q}_1, v_1) + (\mathbf{q}_2, v_2) \rightarrow (\mathbf{q}_3, v_3)$ , in Brillouin zone for D-AB, where  $\mathbf{q}_1 = (0.01, 0, 0)$  (in units of reciprocal lattice vectors),  $v_1 = \text{ZA}$ , and  $v_2 = \text{ZA}$ . The  $v_3$  run over all 18 branches. The color bar is the same as that in Fig. 9.

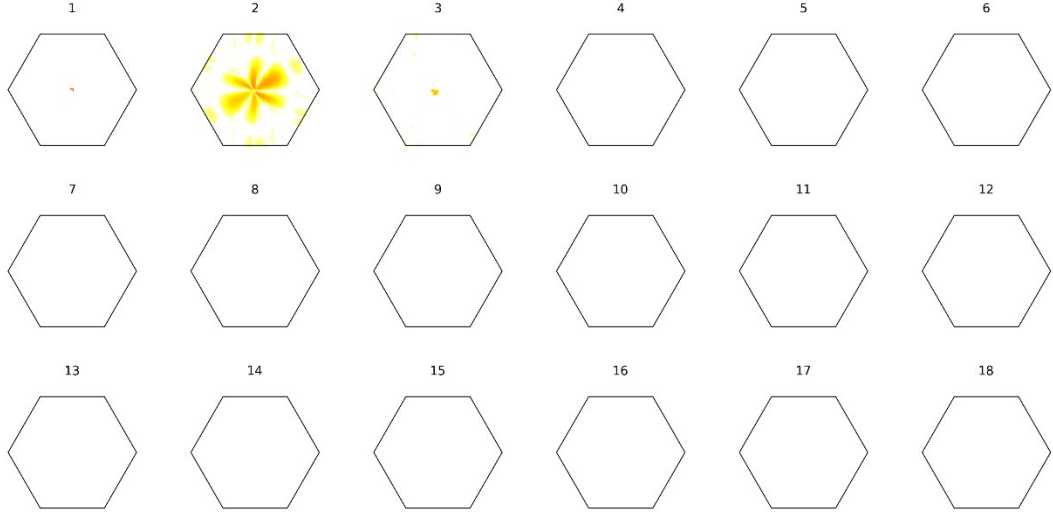

Figure S9. Distribution of scattering rates of a near-zone-center ZA phonon,  $(\mathbf{q}_1, \nu_1) + (\mathbf{q}_2, \nu_2) \rightarrow (\mathbf{q}_3, \nu_3)$ , in Brillouin zone for D-AB, where  $\mathbf{q}_1 = (0.01, 0, 0)$  (in units of reciprocal lattice vectors),  $\nu_1 = \text{ZA}$ , and  $\nu_2 = \text{TA}$ . The  $\nu_3$  run over all 18 branches. The color bar is the same as that in Fig. 9.

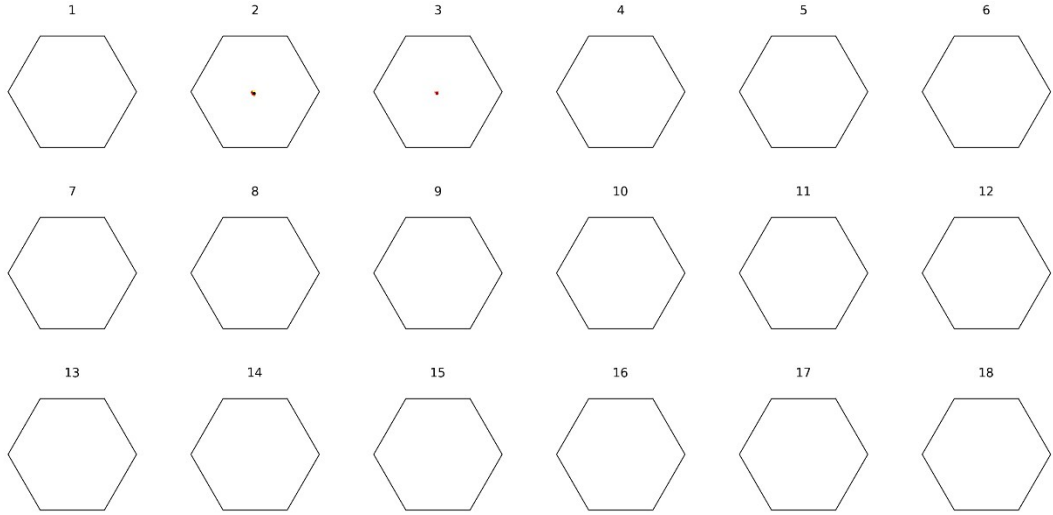

Figure S10. Distribution of scattering rates of a near-zone-center ZA phonon,  $(\mathbf{q}_1, \nu_1) + (\mathbf{q}_2, \nu_2) \rightarrow (\mathbf{q}_3, \nu_3)$ , in Brillouin zone for D-AA, where  $\mathbf{q}_1 = (0.01, 0, 0)$  (in units of reciprocal lattice vectors),  $\nu_1 = \text{ZA}$ , and  $\nu_2 = \text{ZA}$ . The  $\nu_3$  run over all 18 branches.

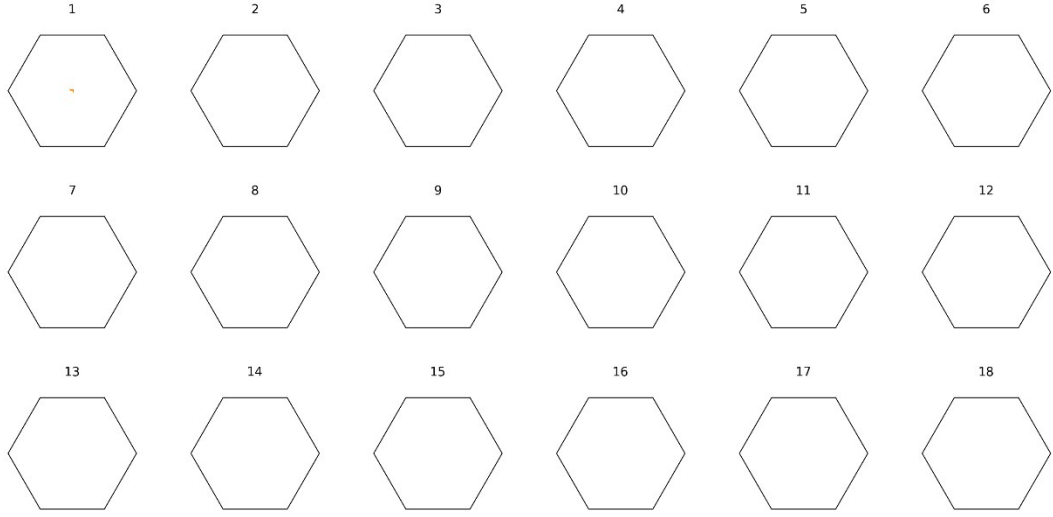

Figure S11. Distribution of scattering rates of a near-zone-center ZA phonon,  $(\mathbf{q}_1, \nu_1) + (\mathbf{q}_2, \nu_2) \rightarrow (\mathbf{q}_3, \nu_3)$ , in Brillouin zone for D-AA, where  $\mathbf{q}_1 = (0.01, 0, 0)$  (in units of reciprocal lattice vectors),  $\nu_1 = \text{ZA}$ , and  $\nu_2 = \text{TA}$ . The  $\nu_3$  run over all 18 branches.
